# Supplementary material for: K–Co–Mo–S x chalcogel: high-capacity removal of Pb 2+ and Ag + and the underlying mechanisms
Source: Royal Society of Chemistry journal article supplement (doi:10.1039/d4ta05158k), 2024-01-01
Supplement: d4ta05158k1.pdf [file d4ta05158k1.pdf]

## **K-Co-Mo-S<sub>x</sub> Chalcogel: High-Capacity Removal of Pb<sup>2+</sup> and Ag<sup>+</sup> and their Underlying Mechanisms**

*Jing Nie<sup>1‡</sup>, Subrata Chandra Roy<sup>1‡</sup>, Sital Dhami<sup>1</sup>, Taohedul Islam,<sup>1</sup> Ruhul Amin<sup>2</sup>, Xianchun Zhu<sup>3</sup>, Kathryn Taylor Pashow,<sup>4</sup> Fengxiang X. Han<sup>1</sup>, Saiful M. Islam<sup>\*1</sup>*

<sup>1</sup>*Department of Chemistry, Physics and Atmospheric Sciences, Jackson State University, Jackson, Mississippi, USA*

<sup>2</sup>*Electrification and Energy Infrastructures Division, Oak Ridge National Laboratory, Hardin Valley Campus, Knoxville, TN, 37830, USA*

<sup>3</sup>*Department of Civil Engineering, Jackson State University, Jackson, Mississippi, USA*

<sup>4</sup>*Savannah River National Laboratory, Aiken, SC-29808, USA*

*‡Joint first author*

## **Supporting Information File**

### **EXPERIMENTAL SECTION**

**Synthesis of K-Co-Mo-S<sub>x</sub> Gels:** K-Co-Mo-S<sub>x</sub> wet-gel is synthesized by metathesis route from the reagent grade precursors of K<sub>2</sub>S, (NH<sub>4</sub>)<sub>2</sub>MoS<sub>4</sub>, I<sub>2</sub>, and Co(NO<sub>3</sub>)<sub>2</sub>·H<sub>2</sub>O purchased from Millipore sigma following the procedure described elsewhere.<sup>1</sup> The wet-gel was then washed with a mixture of ethanol and water in a ratio of 4:1 twice in a day for two days, then only with ethanol and acetone for two times in day for five days and one day, respectively. Afterward, the gels were dried at ambient temperature to get the xerogel.

**Heavy Metal Uptake Experiments:** The heavy metal uptake study was conducted for several metal ions  $M^{n+}$  ( $M = \text{Cd}, \text{Pb}, \text{Cu}, \text{Zn}, \text{Hg}, \text{Ag}, \text{and Ni}$ ). These experiments were carried out by batch methods for different concentrations and time. The  $M^{n+}$  cations,  $\text{Co}^{2+}$ ,  $\text{Ni}^{2+}$ ,  $\text{Cu}^{2+}$ ,  $\text{Zn}^{2+}$ ,  $\text{Ag}^+$ ,  $\text{Pb}^{2+}$ ,  $\text{Cd}^{2+}$ , and  $\text{Hg}^{2+}$  were spiked into the deionized water. A solution of deionized water was then interacted with the 10 mg of KCMS xerogel at different time intervals and concentrations. Subsequently, the solutions were centrifuged at 13000 RPM for 30 minutes to precipitate the adsorbents from the heavy metal-contaminated aqueous solutions. The metal ion concentrations in the supernatant solutions were determined using inductively coupled plasma-mass spectrometry (ICP-MS). The post-interacted solid dried gel was analyzed with SEM/EDX and XRD, and XPS.

## CHARACTERIZATIONS

### **X-ray powder diffraction:**

X-ray powder diffraction of the powdered gels was conducted in a flat glass sample holder using a Rigaku MiniFlex 600 powder X-ray diffractometer with Ni-filtered  $\text{Cu K}_{\alpha 1}$  ( $\lambda = 1.540593 \text{ \AA}$ ) radiation operating at 40 kV and 20 mA. The measurement was performed with a scan width of  $0.02^\circ$  and a scan rate of  $5^\circ/\text{min}$  and the data was collected from  $5 - 80^\circ (2\theta)$ .

### **Electron Microscopy Imaging and Energy Dispersive Spectroscopy:**

A Lyra3 - Tescan scanning electron microscope (SEM) was employed for high-resolution (1.2 nm at 30 keV) imaging and elemental analysis of the samples. During data collection, an accelerating voltage of 20 kV and an accumulation time of 120 seconds were used. Elemental analysis was carried out using the ESED-II (environmental secondary electron detector). The powdered samples were mounted on a carbon-taped metal stub to image the surface morphology of the gels. Samples

were verified by Energy Dispersive Spectroscopy (EDS) and analyzed at a minimum of four spots, with the average composition reported.

#### **Transmission electron microscopy:**

The samples were dispersed in acetone by sonication and drop cast on a TEM copper grid. Transmission Electron Microscopy (TEM) analysis was conducted using JEOL1011 at an accelerating voltage of 100kV in TEM imaging mode.

#### **X-ray Photoelectron Spectroscopy (XPS):**

X-ray photoelectron spectroscopy (XPS) spectra of the finely ground powder of the KCMS xerogel were collected using a Thermo Fisher ESCALAB 250Xi spectrometer with an Al-K $\alpha$  X-ray radiation source, a 500  $\mu$ m spot size, and an electron flood gun to reduce sample charging. Before each spectra collection, Ar was passed at 30 keV for 30 seconds. Each sample was measured in triplicate, and all spectra were charging shift corrected to the C1s peak at 284.8 eV.

#### **Raman Spectroscopy:**

Raman spectroscopy of the post-interacted KCMS gel was collected using a QE65000 spectrometer.

#### **Synchrotron X-ray Pair Distribution Function:**

Synchrotron X-ray pair distribution function data was obtained from the 11-ID-B beamline at the Advanced Photon Source (APS) of Argonne National Laboratory. The rapid-acquisition PDF method was used with an X-ray energy of 58.6 keV ( $\lambda = 0.2115 \text{ \AA}$ ).<sup>2</sup> Sample preparation includes grounding to about the size of 50  $\mu$ m and then packing in a Kapton capillary. The diffraction

patterns of powder samples of KCMS were collected at room temperature by using rapid acquisition pair distribution function (RA-PDF) technique.<sup>2</sup> The data was integrated using the program Fit2D<sup>3</sup> and corrections, such as subtraction of background and container, Compton, and fluorescence scattering, geometric and adsorption correction, etc.,<sup>4</sup> were performed using the program GSAS-II and PDFgetX3.<sup>5</sup> The normalized data were truncated at  $24 \text{ \AA}^{-1}$  before PDF calculation. GSAS-II and PDFgui were used to model the data.<sup>6,7</sup>

### **Inductively Coupled Plasma-Mass Spectrometry (ICP-MS):**

Heavy metals were analyzed from treated water samples by ICP-MS, model: iCAP RQ, Thermo Fisher Scientific, USA. A Multielement Thermo iCAP RQ tuning solution was used to check the performance test of the instrument. Analytical quality control and calibration curves were produced by using single-element certified reference material from SPEX CertiPrep, USA which is accredited to ISO/IEC 17025 ISO 17034.

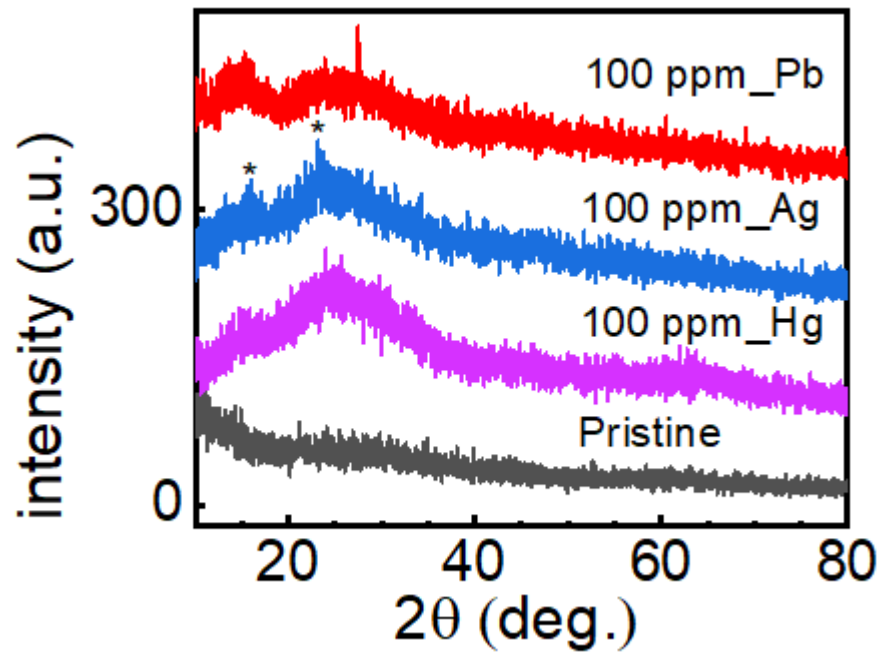

**Figure S1.** Comparison of XRD patterns of heavy metal (100 ppm) treated KCMS with the pristine material.

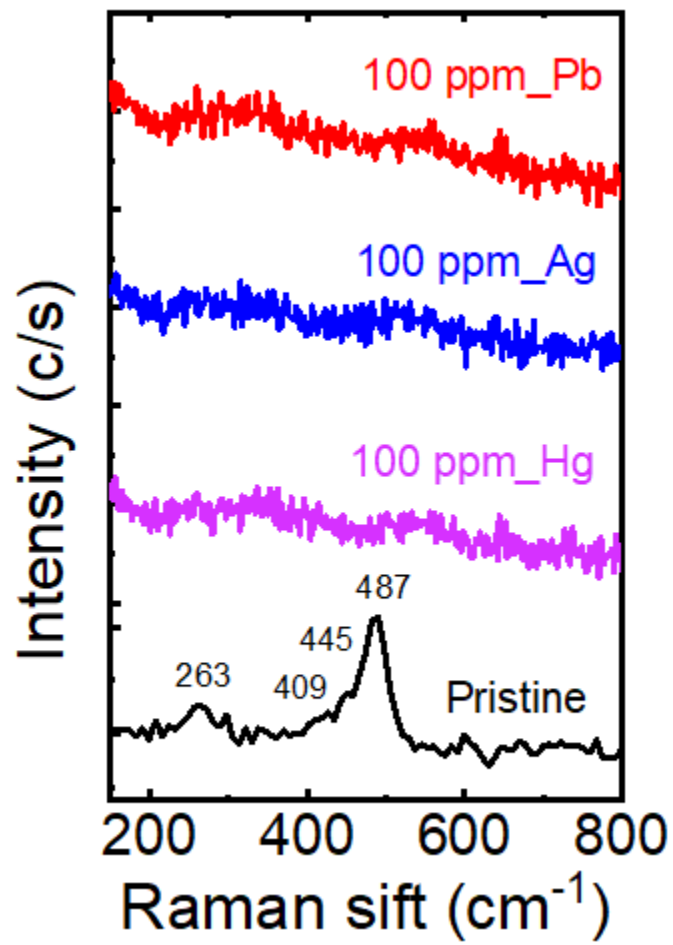

Figure S2. Comparison of Raman spectra of heavy metal (100 ppm) treated KCMS with the pristine material.

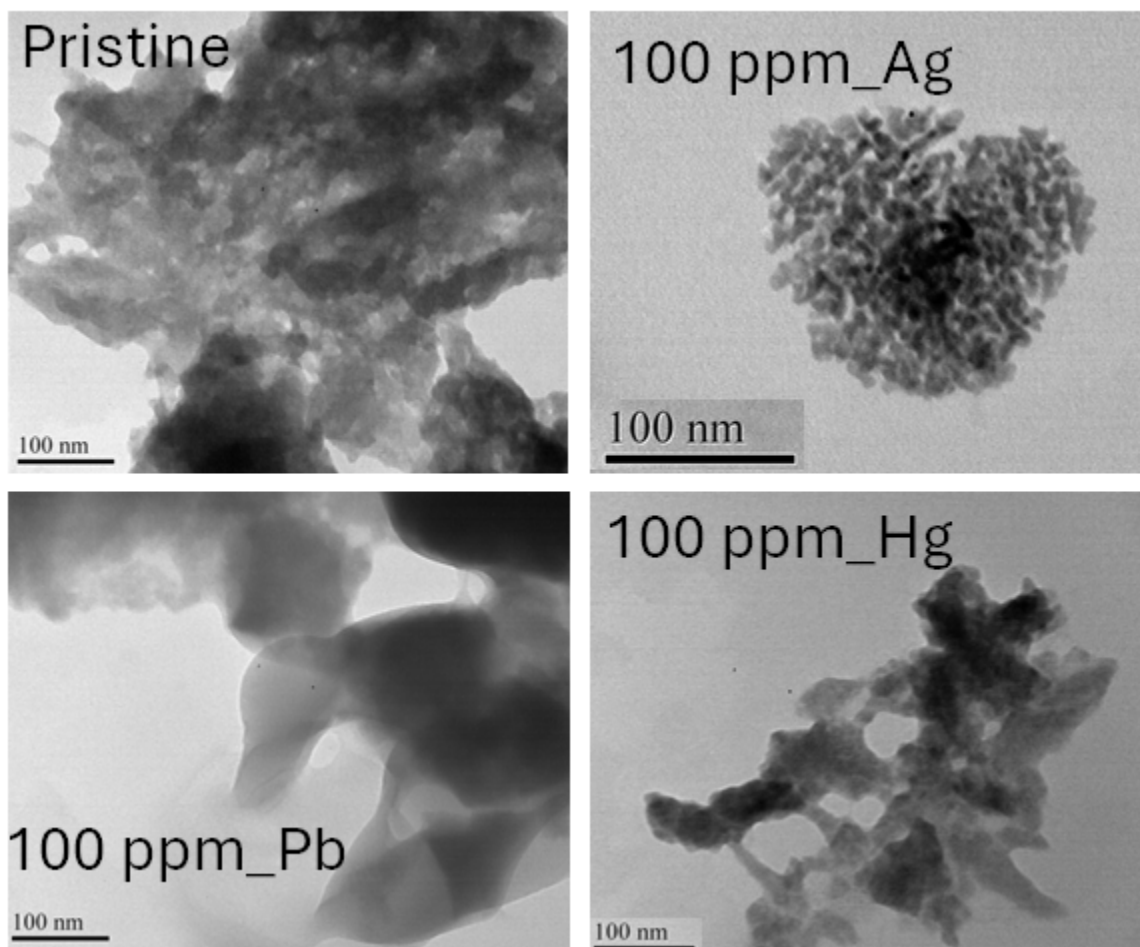

**Figure S3.** Comparison of TEM images of pristine and post  $\text{Ag}^+$ ,  $\text{Pb}^{2+}$ , and  $\text{Hg}^{2+}$  (100 ppm) treated KCMS xerogel.

**Table S1:** Removal of heavy metal cations toward seven **mixed** heavy metal cations in one hour of interactions, (initial concentration: 10 ppm of each, total 70 ppm) by KCMS from wastewater.

| $\text{M}^{n+}$  | $C_i$<br>(ppb)   | $C_f$<br>(ppb)     | $\text{M}^{n+}$<br>removal (%) | $K_d$<br>(mL/g)    |
|------------------|------------------|--------------------|--------------------------------|--------------------|
| $\text{Cu}^{2+}$ | $10 \times 10^3$ | $7.80 \times 10^3$ | 22.00                          | $2.82 \times 10^2$ |
| $\text{Hg}^{2+}$ | $10 \times 10^3$ | $1.30 \times 10^3$ | 87.35                          | $6.91 \times 10^3$ |
| $\text{Ag}^+$    | $10 \times 10^3$ | 0.33               | ~100.00                        | $2.96 \times 10^7$ |
| $\text{Pb}^{2+}$ | $10 \times 10^3$ | $3.92 \times 10^3$ | 62.74                          | $1.68 \times 10^3$ |

|                  |                    |                      |     |       |
|------------------|--------------------|----------------------|-----|-------|
| Cd <sup>2+</sup> | 10×10 <sup>3</sup> | 10×10 <sup>3</sup>   | 0.0 | 0.0   |
| Ni <sup>2+</sup> | 10×10 <sup>3</sup> | 9.24×10 <sup>3</sup> | 7.6 | 86.24 |
| Zn <sup>2+</sup> | 10×10 <sup>3</sup> | 10×10 <sup>3</sup>   | 0.0 | 0.0   |

contact time: 1 h, V = 10.0 mL; m (mass of KCMS) =0.01g; V/m ratio=10/0.01=1000 mL/g.

**Table S2.** Kinetics results for the adsorption Ag<sup>+</sup>, Pb<sup>2+</sup>, and Hg<sup>2+</sup> by KCMS chalcogel in a single ion state.

| Single cations   | Time (min.) | C <sub>i</sub> (ppb) | C <sub>f</sub> (ppb) | SD     | M <sup>n+</sup> removal (%) | SD   | K <sub>d</sub> (mL/g) | q <sub>t</sub> (mg/g) |
|------------------|-------------|----------------------|----------------------|--------|-----------------------------|------|-----------------------|-----------------------|
| Ag <sup>+</sup>  | 5           | 10×10 <sup>3</sup>   | 1822.7               | 42.28  | 81.77                       | 0.42 | 4.49×10 <sup>3</sup>  | 8.177                 |
|                  | 15          | 10×10 <sup>3</sup>   | 11.00                | 0.57   | 99.89                       | 0.01 | 9.08×10 <sup>5</sup>  | 9.989                 |
|                  | 30          | 10×10 <sup>3</sup>   | 7.85                 | 0.70   | 99.92                       | 0.01 | 1.27×10 <sup>6</sup>  | 9.992                 |
|                  | 60          | 10×10 <sup>3</sup>   | 3.25                 | 1.91   | 99.97                       | 0.02 | 3.08×10 <sup>6</sup>  | 9.996                 |
| Pb <sup>2+</sup> | 5           | 10×10 <sup>3</sup>   | 48.62                | 7.14   | 99.51                       | 0.26 | 2.04×10 <sup>5</sup>  | 9.951                 |
|                  | 15          | 10×10 <sup>3</sup>   | 2.50                 | 3.39   | 99.98                       | 0.03 | 3.99×10 <sup>6</sup>  | 9.997                 |
|                  | 30          | 10×10 <sup>3</sup>   | 0.10                 | 0.00   | 100.0                       | 0.00 | ~10 <sup>8</sup>      | 9.999                 |
|                  | 60          | 10×10 <sup>3</sup>   | 0.10                 | 0.00   | 100.0                       | 0.00 | ~10 <sup>8</sup>      | 9.999                 |
| Hg <sup>2+</sup> | 5           | 10×10 <sup>3</sup>   | 1387.8               | 161.08 | 86.12                       | 1.61 | 6.20×10 <sup>3</sup>  | 8.700                 |
|                  | 15          | 10×10 <sup>3</sup>   | 1299.6               | 497.52 | 87.00                       | 4.98 | 6.69×10 <sup>3</sup>  | 9.679                 |
|                  | 30          | 10×10 <sup>3</sup>   | 320.8                | 36.06  | 96.79                       | 0.36 | 3.01×10 <sup>4</sup>  | 9.763                 |
|                  | 60          | 10×10 <sup>3</sup>   | 236.8                | 14.42  | 97.63                       | 0.14 | 4.12×10 <sup>4</sup>  | 9.999                 |

V = 10.0 ml; m (mass of KCMS) =0.01g; V/m ratio=10/0.01=1000 mL/g.

**Table S3:** Kinetic parameters obtained using the pseudo-second-order rate equation for Ag<sup>+</sup>, Pb<sup>2+</sup> and Hg<sup>2+</sup>

| Parameters            | Ag <sup>+</sup>         | Pb <sup>2+</sup>        | Hg <sup>2+</sup> |
|-----------------------|-------------------------|-------------------------|------------------|
| intercept             | 6.8089×10 <sup>-2</sup> | 2.6800×10 <sup>-3</sup> | 0.1396           |
| slope                 | 9.8593×10 <sup>-2</sup> | 9.9991×10 <sup>-2</sup> | 0.1000           |
| R <sup>2</sup>        | 0.999                   | 1                       | 0.999            |
| q <sub>e</sub> (mg/g) | 10.14                   | 10.00                   | 9.99             |



|                                 |                      |        |                      |
|---------------------------------|----------------------|--------|----------------------|
| $q_e^2$ (mg/g) <sup>2</sup>     | 102.88               | 100.02 | 99.82                |
| $k_2$ (g/mg·min <sup>-1</sup> ) | 1.4×10 <sup>-1</sup> | 3.73   | 7.1×10 <sup>-2</sup> |

**Table S4.** Concentration-dependent removal (%), distribution constant,  $K_d$ , and sorption capacity,  $q_m$  of heavy metal cations, **Ag<sup>+</sup>**, **Pb<sup>2+</sup>**, and **Hg<sup>2+</sup>** by KCMS gel.

| Metal ions             | Ci (ppm) | Cf (ppm) | Removal (%) | $K_d$ (mL/g)         | $q_m$ (mg/g) |
|------------------------|----------|----------|-------------|----------------------|--------------|
| <b>Ag<sup>+</sup></b>  | 10       | 0.0035   | 99.96       | 2.84×10 <sup>6</sup> | 10           |
|                        | 50       | 0.1294   | 99.74       | 3.85×10 <sup>5</sup> | 49.87        |
|                        | 100      | 0.0696   | 99.86       | 1.44×10 <sup>5</sup> | 99.93        |
|                        | 250      | 0.2760   | 99.72       | 9.05×10 <sup>5</sup> | 249.724      |
|                        | 500      | 0.5420   | 93.78       | 9.21×10 <sup>5</sup> | 499.458      |
|                        | 750      | 0.526    | 99.89       | 1.42×10 <sup>6</sup> | 749.474      |
|                        | 1000     | 42.224   | 94.37       | 2.27×10 <sup>4</sup> | 957.776      |
|                        | 1500     | 122.328  | 87.77       | 1.12×10 <sup>4</sup> | 1377.672     |
| <b>Pb<sup>2+</sup></b> | 10       | 0.0090   | 99.91       | 1.10×10 <sup>6</sup> | 9.99         |
|                        | 50       | 0.3391   | 99.32       | 1.46×10 <sup>5</sup> | 49.66        |
|                        | 100      | 0.5064   | 99.49       | 1.96×10 <sup>5</sup> | 99.49        |
|                        | 250      | 44.741   | 82.10       | 4.59×10 <sup>3</sup> | 205.26       |
|                        | 500      | 173.60   | 65.28       | 1.88×10 <sup>3</sup> | 326.40       |
|                        | 1000     | 561.26   | 43.87       | 7.81×10 <sup>2</sup> | 438.74       |
|                        | 1500     | 477.23   | 68.18       | 2.14×10 <sup>3</sup> | 1022.77      |
|                        | 3000     | 1853.81  | 38.21       | 6.18×10 <sup>2</sup> | 1146.19      |
| <b>Hg<sup>2+</sup></b> | 10       | 0.0095   | 99.91       | 1.05×10 <sup>6</sup> | 9.99         |
|                        | 50       | 0.2732   | 99.45       | 1.82×10 <sup>5</sup> | 49.72        |
|                        | 100      | 0.4382   | 99.56       | 2.72×10 <sup>5</sup> | 99.56        |
|                        | 250      | 8.026    | 96.79       | 3.01×10 <sup>4</sup> | 241.97       |
|                        | 500      | 316.174  | 56.77       | 1.31×10 <sup>3</sup> | 283.83       |
|                        | 1000     | 539.432  | 46.06       | 8.53×10 <sup>2</sup> | 460.57       |
|                        | 1500     | 1047.252 | 30.18       | 4.32×10 <sup>2</sup> | 452.75       |

contact time: 1 h, V = 10.0 mL;  $m$  (mass of KCMS) = 0.01g; V/m ratio = 10/0.01 = 1000 mL/g

**Table S5.** Average EDS compositions of the post-interacted KCMS gel spiked with different concentrations of Pb<sup>2+</sup> ions, compositions are in atomic percentage.

| KCMS                         | S-K   | K-K   | Co-K | Mo-L  | Pb-L |
|------------------------------|-------|-------|------|-------|------|
| Pristine                     | 67.42 | 12.59 | 9.57 | 10.42 |      |
| Pb <sup>2+</sup> 100 ppm_pt1 | 71.23 | 0     | 6.87 | 14.51 | 7.39 |
| Pb <sup>2+</sup> 100 ppm_pt2 | 77.36 | 0     | 3.03 | 11.33 | 8.29 |

|                               |              |             |             |              |              |
|-------------------------------|--------------|-------------|-------------|--------------|--------------|
| Pb <sup>2+</sup> 100 ppm_pt3  | 78.1         | 0.09        | 2.29        | 13.45        | 6.07         |
| Pb <sup>2+</sup> 100 ppm_pt4  | 78.97        | 0.34        | 5.37        | 9.07         | 6.26         |
| <b>Average</b>                | <b>76.42</b> | <b>0.11</b> | <b>4.39</b> | <b>12.09</b> | <b>7.00</b>  |
| Pb <sup>2+</sup> 2000 ppm_pt1 | 44.49        | 0.19        | 0.26        | 13.38        | 41.68        |
| Pb <sup>2+</sup> 2000 ppm_pt2 | 38.24        | 0.15        | 0.04        | 19.3         | 42.27        |
| Pb <sup>2+</sup> 2000 ppm_pt3 | 67.47        | 0.09        | 0.18        | 8.2          | 24.07        |
| Pb <sup>2+</sup> 2000 ppm_pt4 | 52.77        | 0.11        | 0.31        | 12.61        | 34.2         |
| <b>Average</b>                | <b>50.74</b> | <b>0.14</b> | <b>0.20</b> | <b>13.37</b> | <b>35.56</b> |

**Table S6.** Average EDS compositions of the post-interacted KCMS gel spiked with different concentrations of Ag<sup>+</sup> ions, compositions are in atomic percentage.

| KCMS                         | S-K          | K-K         | Co-K        | Mo-L         | Ag-L         |
|------------------------------|--------------|-------------|-------------|--------------|--------------|
| Pristine                     | 67.42        | 12.59       | 9.57        | 10.42        |              |
| Ag <sup>+</sup> 100 ppm pt1  | 75.93        | 0.15        | 2.45        | 10.78        | 10.69        |
| Ag <sup>+</sup> 100 ppm pt2  | 76.68        | 0.01        | 3.93        | 10.81        | 8.56         |
| Ag <sup>+</sup> 100 ppm pt3  | 76.12        | 0           | 4.42        | 10.19        | 9.27         |
| Ag <sup>+</sup> 100 ppm pt4  | 65.02        | 0           | 3.04        | 10.69        | 21.24        |
| <b>Average</b>               | <b>73.44</b> | <b>0.04</b> | <b>3.46</b> | <b>10.62</b> | <b>13.02</b> |
| Ag <sup>+</sup> 1500 ppm_pt1 | 60.24        | 0           | 1.48        | 7.62         | 30.66        |
| Ag <sup>+</sup> 1500 ppm pt2 | 57.81        | 0           | 2.28        | 8.73         | 31.18        |
| Ag <sup>+</sup> 1500 ppm pt3 | 58.18        | 0           | 3.02        | 7.77         | 31.03        |
| Ag <sup>+</sup> 1500 ppm pt4 | 56.04        | 0           | 2.72        | 8.15         | 33.08        |
| <b>Average</b>               | <b>58.07</b> | <b>0</b>    | <b>2.38</b> | <b>8.07</b>  | <b>31.49</b> |

**Table S7.** Average EDS compositions of the post-interacted KCMS gel spiked with different concentrations of Hg<sup>2+</sup> ions, compositions are in atomic percentage.

| KCMS                         | S-K   | K-K   | Co-K | Mo-L  | Hg-L |
|------------------------------|-------|-------|------|-------|------|
| Pristine                     | 67.42 | 12.59 | 9.57 | 10.42 |      |
| Hg <sup>2+</sup> 100 ppm_pt1 | 81.93 | 0     | 6.03 | 5.4   | 6.64 |
| Hg <sup>2+</sup> 100 ppm_pt2 | 85.51 | 0     | 4.8  | 5.53  | 4.15 |
| Hg <sup>2+</sup> 100 ppm_pt3 | 84.51 | 0     | 5.94 | 5.71  | 3.84 |

|                               |              |             |             |             |              |
|-------------------------------|--------------|-------------|-------------|-------------|--------------|
| Hg <sup>2+</sup> 100 ppm_pt4  | 85.14        | 0           | 5.18        | 5.99        | 3.68         |
| <b>Average</b>                | <b>84.27</b> | <b>0.00</b> | <b>5.49</b> | <b>5.66</b> | <b>4.58</b>  |
| Hg <sup>2+</sup> 1000 ppm_pt1 | 81.8         | 0           | 2.79        | 6.66        | 8.75         |
| Hg <sup>2+</sup> 1000 ppm_pt2 | 82.82        | 0.02        | 2.16        | 3.56        | 11.44        |
| Hg <sup>2+</sup> 1000 ppm_pt3 | 67.29        | 0           | 2.03        | 1.06        | 29.62        |
| Hg <sup>2+</sup> 1000 ppm_pt4 | 76.56        | 0           | 2.84        | 4.08        | 16.52        |
| <b>Average</b>                | <b>75.56</b> | <b>0.01</b> | <b>2.46</b> | <b>3.84</b> | <b>16.58</b> |

## REFERENCES

- 1J. Nie, T. Islam, S. C. Roy, D. Li, R. Amin, K. Taylor-Pashow, X. Zhu, R. Feng, R. Chernikov, A. Pramanik, F. X. Han, A. S. Kumbhar and S. M. Islam, *Small*, 2024, 2400679.
- 2P. J. Chupas, X. Qiu, J. C. Hanson, P. L. Lee, C. P. Grey and S. J. L. Billinge, *J Appl Crystallogr*, 2003, **36**, 1342–1347.
- 3A. P. Hammersley, S. O. Svensson, M. Hanfland, A. N. Fitch and D. Hausermann, *High Pressure Research*, 1996, **14**, 235–248.
- 4T. Egami and S. J. L. Billinge, *Underneath the Bragg Peaks: Structural Analysis of Complex Materials*, Elsevier Science, Burlington, 2nd ed., 2012.
- 5P. Juhás, T. Davis, C. L. Farrow and S. J. L. Billinge, *J Appl Crystallogr*, 2013, **46**, 560–566.
- 6C. L. Farrow, P. Juhas, J. W. Liu, D. Bryndin, E. S. Božin, J. Bloch, T. Proffen and S. J. L. Billinge, *J. Phys.: Condens. Matter*, 2007, **19**, 335219.
- 7B. H. Toby and R. B. Von Dreele, *J Appl Crystallogr*, 2013, **46**, 544–549.
